# Supplementary material for: Cardio-oncology: an overview on outpatient management and future developments
Source: Neth Heart J. 2018 Aug 23;26(11):521–32. doi: 10.1007/s12471-018-1148-7 (PMC6220023; doi:10.1007/s12471-018-1148-7)
Supplement: Supplementary file 1 — In the supplementary file we have provided the absolute risk (and clinical manifestations) for the most common 75 anti-cancer agents (sheet 1) with the corresponding references (sheet 2). The classification according to our modified CRS is provided (0 points = green, 1 point = yellow, 2 points = orange, 4 points = red). Furthermore, the abbreviations of the most commonly encountered 50 combinations of these agents are provided (sheet 3). [file 12471_2018_1148_MOESM1_ESM.xlsx]

## Sheet: agents
Class	Treatment/Drugs	Therapeutic indication	Incidence CTRCD	CRS Classification	Other manifestations of cardiotoxicity	Notes	Reference
Alkylating Agents	Cyclophosphamide (Endoxan)	Leukemias; Lymphomas; Various solid tumours;	7-28%	4	Pericarditis; Myocarditis; Cardiac tamponade;	Dose-related. >150mg/kg/day or >1.5g/m2/day		Goldberg MA, Antin JH, Guinana EC, et al. Cycophosphamide cardiotoxicity: an analysis of dosing as a risk factor. Blood. 1986;68:1114-8	Gottdiener JS, Appelbaum FR, Ferrans VJ, et al. Cardiotoxicity associated with high-dose cyclophosphamide therapy. Arch Intern Med. 1981;141:758-63	Steinherz LJ, Steinherz PG, Mangiacasale D, et al. Cardiac changes with cyclophosphamide. Med Pedriatr Oncol. 1981;9:417-22	Yeh ET, Bickford CL. Cardiovascular complications of cancer therapy: incidence, pathogenesis, diagnosis, and management. J Am Coll Cardiol. 2009;53(24):2231-2247
	Ifosfamide (Ifex)	Leukemias; Lymphomas; Various solid tumours;	0-17%	4	Arrhythmias; STT-wave changes;	Dose-related; Incidence is based on patients with prior or concurrent anthracycline administration;		Quezado ZM, Wilson WH, cunnion RE, et al. High-dose ifosfamide is associated with severe, reversible cardiac dysfunction. Ann Intern Med. 1993;11891):31-6	Antman K, Crowley J, Balcerzak SP, et al. An intergroup phase III randomized study of doxorubicin and dacarbazine with or without ifosfamide and mensa in advanced soft tissue and bone sarcomas. J Clin Oncol. 1993;11(7):1276-85
	Bendamustine	Chronic lymphatic leukemia; Non-Hodgkin lymphoma; Multiple myeloma;	<1%	0	Arrhythmias (5%);			Cheson BD, Brugger W, Damaj G, et al. Optimal use of bendamustine in hematological disorders: Treatment recommendations from an international consensus panel - an update
	Busulfan (Busilvex)	Pre-stem cell transplantation;	<1%	0	Endomyocardial fibrosis (case report);			Pai VB, Nahata MC. Cardiotoxicity of chemotherapeutic agents: incidence, treatment and prevention. Drug Saf. 2000; 22(4):263-302.
	Carboplatin (Carbosin)	Ovarian cancer; Small cell lung carcinoma;	<1%	0	Coronary spasm (case report);			Khan S, Chen CL, Brady MS, et al. Unstable angina associated with cisplatin and carboplatin in a patient with advanced melanoma. Journal of Clinical Oncology. 2012 30(18):163-164
	Carmustine (BCNU)	Brain cancer; Pre-stem cell transplant;	<1%	0	Chest pain; Hypotension; Sinus tachycardia;			Pai VB, Nahata MC. Cardiotoxicity of chemotherapeutic agents: incidence, treatment and prevention. Drug Saf. 2000; 22(4):263-302.
	Cisplatin	Germ cell tumors; Ovarian cancer; Lymphomas; Lung cancer; Sarcomas;	<1%	0	Endothelial injury; Arterial thrombosis; Vascular fibrosis;			Pai VB, Nahata MC. Cardiotoxicity of chemotherapeutic agents: incidence, treatment and prevention. Drug Saf. 2000; 22(4):263-302.	Khan S, Chen CL, Brady MS, et al. Unstable angina associated with cisplatin and carboplatin in a patient with advanced melanoma. Journal of Clinical Oncology. 2012 30(18):163-164
	Melphalan (Alkeran)	Pre-stem cell transplant;	<1%	0	Atrial fibrillation; Supraventricular tachycardia;	Cardiotoxic when administered in combination with fludarabine		Feliz V, Saiyad S, Ramarao SM, et al. Melphalan-induced supraventricular tachycardia: incidence and risk factors. Clin Cardiol. 2011; 34(6):356-359	Ritchi DS, Seymour JF, Roberts AW et al. Acute left ventricular failure following melphalan and fludarabine conditioning. Bone Marrow Transplantation. 2001; 28:101-103
Anthracyclines	Doxorubicin (Adriamycin)	Breast cancer; Leukemias; Lymphomas; Gastric tumour; Lung cancer; Ovarian cancer; Sarcomas;	3-48%	4		Doses ranging from 150mg/m2 to >700mg/m2		Swain SM, Whaley FS, Ewer MS. Congestive heart failure in patients treated with doxorubicin. Cancer. 2003;97(11):2869-79	von Hoff Dd, Layard MW, Basa P, et al. Risk factors for doxorubicin-induced congestive heart failure. Ann Intern Med. 1979;91(5):710-7
	Epirubicin	'	0.9-11.4%	4		>900mg/m2		Ryberg M, Nielsen D, Cortese G, et al. New insight into epirubicin cardiac toxicity: competing risk analysis of 1097 breast cancer patients. J Natl Cancer Inst. 2008;100(15):1058-67
	Idarubicin (Zavedos)	'	5-18%	4		>150mg/m2		Anderlini P, Benjamin RS, Wong FC, et al. Idarubicin cardiotoxicity: a retrospective study in acute myeloid leukemia and myelodysplasia. J Clin Oncol. 1995;13:2827-34
	Daunorubicin (Cerubidine)		1,2-9,9%	2	Cardiac arrhythmias; Myocardial ischemia; ST-T wave abnormalities;	Doses ranging from 360-1260mg/m2		von Hoff DD, Rozencweiq M, Layard M, et al. Daunomycin-induced cardiotoxicity in children and adults. A review of 110 cases. Am J Med. 1977;62(2):200-8	Halazun JF, Wagner Hr, Gaeta JF. Daunorubicin cardiac toxicity in children with acute lymphocytic leukemia. Cancer. 1974;33(2):545-54
	Mitoxantrone	'	4,1-5,3%	2		>120mg/m2		Smith IE. Mitoxantrone (novantrone): a review of experimental and early clinical studies. Cancer Treat Rev. 1983;10:103-15	Fleischer V, Salmen A, Kollar S et al. Cardiotoxicity of mitoxantrone treatment in a German cohort of 639 multiple sclerosis patients. J Clin Neurol. 2014;10(4):289-295
Antimetabolites	Clofarabine (Evolta)	Acute lymphatic leukemia;	0-27%	4				Yeh ET, Bickford CL. Cardiovascular complications of cancer therapy: incidence, pathogenesis, diagnosis, and management. J Am Coll Cardiol. 2009;53(24):2231-2247
	5-Fluorouracil	Gastro-intestinal tumours; Breast cancer; Cervix cancer;	<1%	4*	* High incidence (0,6-19%): Angina pectoris; Acute myocardial infarction; Coronary vasospasm; (0,55-19%)			Kelly C, Bhuva N, Harrison M, et al. Use of raltitrexed as an alternative to 5-fluorouracil and capecitabine in cancer patients with cardiac history. Eur J Cacer. 2013;49910):2303-10	Polk A, Vaage-Nilsen M, Vistisen K, et al. Cardiotoxicity in cancer patients treated with 5-fluorouracil or capecitabine: a systematic review of incidence, manifestations and predisposing factors. Cancer Treatment Reviews. 2013;19:974-84
	Capecitabine (Xeloda)	Gastro-intestinal tumours; Breast cancer;	<1%	4*	* High incidence (0,6-19%): Angina pectoris; Acute myocardial infarction; Coronary vasospasm; (0,55-19%)			Kelly C, Bhuva N, Harrison M, et al. Use of raltitrexed as an alternative to 5-fluorouracil and capecitabine in cancer patients with cardiac history. Eur J Cacer. 2013;49910):2303-10	Polk A, Vaage-Nilsen M, Vistisen K, et al. Cardiotoxicity in cancer patients treated with 5-fluorouracil or capecitabine: a systematic review of incidence, manifestations and predisposing factors. Cancer Treatment Reviews. 2013;19:974-84
	Azaciditine	Myelodysplastic syndrome; Leukemias;	<1%	0	Pericardial effusion; Myocarditis;			Navada SC, Silverman LR. Safety and efficacy of azacitidine in elderly patients with intermediate to high-risk myelodysplastic syndromes. Ther Adv Hematol. 2017;16(8):805-10	Newman M, Malla M, Gojo I. Azacitidine-induced pericarditis: a case series. Pharmacotherapy. 2016;36(4):690-5	Bibault JE, Cambier N, Lemahieu JM, et al. Acute myocarditis induced by hypomethylating agents. J Clin Oncol. 2011;29(14):e411-2
	Cladribine (Leustatin)	Hairy cell leukemia; Chronic lymphatic leukemia;	<1%	0				Pai VB, Nahata MC. Cardiotoxicity of chemotherapeutic agents: incidence, treatment and prevention. Drug Saf. 2000; 22(4):263-302.	Koczwara B, Spangenthal E, Bernstein SH. The development of congestive cardiac failure in a patient with hairy cell leukemia treated with 2-chlorodeoxyadenosine. Leukemia & Lymphoma. 1997; 26:413-415
	Cytarabine (AraC)	(Non) Hodgkin lymphoma; Acute leukemia;	<1%	0	Pericarditis, progressing to pericardial effusion and cardiac tamponade;			Pai VB, Nahata MC. Cardiotoxicity of chemotherapeutic agents: incidence, treatment and prevention. Drug Saf. 2000; 22(4):263-302.	Reykdal S, Sham R, Kouides P. Cytarabine-induced pericarditis: a case report and review of the literature on the cardio-pulmonary complications of cytarabine therapy. Leuk Res. 1995;19(2):141-4
	Fludarabine (Fludara)	Pre-stem cell transplant;	<1%	0	Hypotension; Chest pain;	Cardiotoxic when administered in combination with melphalan		Gutheil J, Finucane D. Antimetabolites. In: The chemotherapy Sourcebook, 3rd, Perry MC, Lippincott, Williams and Wilkins, Philadelphia 2001, p 208.
	Gemcitabine	Non-small cell lung cancer; Bladder cancer; Breast cancer; Ovarian cancer;	<1%	0	Cardiac arrhythmias (0.7-1.4%); Exsudative pericarditis (0.2%)			Khan MF, Gottesman S, Boyella R et al, Gemcitabine-induced cardiomyopathy: a case report and review of the literature. Journal of Medical Case Reports 2014; 8:220
	Mercaptopurine (Xaluprine)	Acute and chronic leukemia; Inflammatory bowel disease;	<1%	0	No reports in literature
	Pentostatin	Hairy cell leukemia; Chronic lymphatic leukemia;	<1%	0	Case reports on cardiac complications;			Grem JL, King SA, Chun GH, et al. Cardiac complications observed in elderly patients follow 2'-deoxycoformycin therapy. American Journal of Hematology. 1991; 38(3):245-247
Antitumor antibiotics	Mitomycin C	Gastro-intestinal tumours; Bladder cancer;	0-26 %	4		Dose-related; Incidence is based on patients with prior or concurrent anthracycline administration;		Pai VB, Nahata MC. Cardiotoxicity of chemotherapeutic agents: incidence, treatment and prevention. Drug Saf. 2000; 22(4):263-302.	Jeha S, Gaynon PS, Razzouk BI, et al. Phase II study of clofarabine in pediatric patients with refractory or relapsed acute lymphoblastic leukemia. J Clin Oncol. 2006;24(12):1917-23.	Thomas X, de Botton S, chevret S, et al. Randomized phase II study of clofarabine-based consolidation for younger adults with acute myeloid leukemia in first remission. J Clin Onc	https://www.accessdata.fda.gov/drugsatfda_docs/label/2004/021673lbl.pdf
	Bleomycin	Lymphomas; Lung cancer; Germ cell tumours; Squamous cell carcinoma; Gastric cancer; Pancreatic cancer;	<1%	0	Pericarditis; Endothelial dysfunction and accelerated atherosclerosis; Myocardial ischemia;	Dose-related;		Jones RL, Ewer MS. Cardiac and cardiovascular toxicity of nonanthracycline anticancer drugs. Expert Review of Anticancer Therapy. 2006; 6(9):1249-69	Vogelzang NJ, Frenning DH, Kennedy BJ, et al. Coronary artery disease after treatment with bleomycin and vinblastine. Cancer Treat Rep. 1980;64(10-11):1159
Biologic response modifiers	Interferon-α	Lymphomas; Leukemias; Melanoma;	4.4%	1	Arrhythmias and conduction disorders (20%);	Mostly reversible cardiomyopathy, rechallenge is possible;		Ewer MS, Suter TM, Lenihan DJ, et al. Cardiovascular events among 1090 cancer patients treated with sunitinib, interferon, or placebo: A comprehensive adjudicated database analysis demonstrating clinically meaningful reversibility of cardiac events. Eur J Canc (2014)50:2162-2170	Slørdal L, Spigset O. Heart failure induced by non-cardiac drugs. Drug safety. 2006;29(7):567-586
	Interleukin-2	Renal cell carcinoma; Melanoma;	<1%	0	Arrhythmias (5-20%); Hypotension; Ischemia (1-4%);			Slørdal L, Spigset O. Heart failure induced by non-cardiac drugs. Drug safety. 2006;29(7):567-586	Jones RL, Ewer MS. Cardiac and cardiovascular toxicity of nonanthracycline anticancer drugs. Expert Review of Anticancer Therapy. 2006; 6(9):1249-69
Microtubule-targeting drugs	Vinblastine	Lymphomas; Testicular cancer; Breast cancer;	5-10%	2	Hypertension; Myocardial ischemia;			Vogelzang NJ, Frenning DH, Kennedy BJ, et al. Coronary artery disease after treatment with bleomycin and vinblastine. Cancer Treat Rep. 1980;64(10-11):1159
	Docetaxel (Taxotere)	Breast cancer; Non-small cell lung carcinoma; Prostate cancer; Gastric cancer;	1.6-2%	1				Marty M, Cognetti F, Maraninchi D, et al. Randomized phase II trial of the efficacy and safety of trastuzumab combined with docetaxel in patients with human epidermal growth factor receptor 2-positive metastatic breast cancer administered as first-line treatment: the M77001 study group. J Clin Oncol 2005; 23:4265-4274
	Vinorelbine (Navelbine)	Breast cancer; Non-small cell lung carcinoma;	1.2%	1	Myocardial ischemia;			Lapeyre-Mestre M, Gregoire N, Bugat R, et al. Vinorelbine-related cardiac events: a meta-analysis of randomized clinical trials. Fundam Clin Pharmacol. 2004; 18(1):97-105
	Eribuline (Halaven)	Breast cancer; Liposarcoma;	<1%	0	QT interval prolongation;			Lesimple T, Edeline J, Carrothers TJ, et al. A phase I, open-label, single-arm study for QT assessment of eribulin mesylate in patients with advanced solid tumors. Investigational New Drugs. 2013; 31(4):900-909
	Ixabepilone	Breast cancer;	<1%	0		More cardiac events when administrated in combination with capecitabine;		Perez EA, Lerzo G, Pivot X, et al. Efficacy and safety of ixabepilone (BMS-247550) in a phase II study of patients with advanced breast cancer resistant to an anthracycline, a taxane and capecitabine. J Clin Oncol. 2007;25:3407	Thomas ES, Gomez HL, Li RK, et al. Ixabepilone plus capectabine for metastatic breast cancer progressing after anthracycline and taxane treatment. J Clin Oncol. 2007;25:5210
	Paclitaxel (Abraxane)	Ovarian cancer; Breast cancer; Non-small cell lung carcinoma;	<1%	0	Arrhythmias (4%)	Enhancement of doxorubicin cardiotoxicity;		Arbuck SG, Strauss H, Rowinsky E, et al. A reassessment of cardiac toxicity associated with Taxol. J Natl Cancer Inst Monogr. 1993;15:117-30	Rowinsky EK, McGuire WP, Quarnieri T, et al. Cardiac disturbances during the administration of taxol. J Clin Oncol. 1991;9(9):1704-12	Perez EA. Paclitaxel in breast cancer. The oncologist. 1998;3:373-389
	Vincristine	Leukemias; Lymphomas; Breast cancer; Small cell lung carcinoma;	<1%	0	Autonomic cardioneuropathy; Myocardial ischemia;			Hong WK, Nicaise C, Lawson R, et al. Etoposide combined with cyclophosphamide plus vincristine compared with doxorubicin plus cyclophosphamide plus vincristine and with high-dose cyclophosphamide plus vincrstine in the treatment of small-cell carcinoma of the lung: a randomized trial of the bristol lung cancer study group. J Clin Oncol. 1989;7(4):450-6	Chatterjee K, Zhang J, Honbo N, et la. Acute vincristine pretreatment protects adult mouse cardiac myocytes from oxidative stress. J Mol Cell Cardiol. 2007;43(3):327-36	Cargill RI, Boyter AC, Lipworth BJ. Reversible myocardial ischaemia following vincristine containing chemotherapy. Respir Med. 1994;88(9):709-10
Monoclonal antibody-based tyrosine kinase inhibitors	Trastuzumab (Herceptin)	Breast cancer; Gastrointestinal cancers;	2-28%	4	Vascular thrombosis; Arrhythmia;	Type II dysfunction; Rechallenge is possible;		Yeh ET, Bickford CL. Cardiovascular complications of cancer therapy: incidence, pathogenesis, diagnosis, and management. J Am Coll Cardiol. 2009;53(24):2231-2247	Mantarro S, Rossi M, Bonifazi M, et al. Risk of severe cardiotoxicity following treatment with trastuzumab: a meta-analysis of randomized and cohort studies of 29,000 women with breast cancer. Intern Emerg Med. 2016;11:123-140.
	Pertuzumab (Perjeta)	Breast cancer;	3-7%	2				Lenihan D, Suter T, Brammer M, Neate C, Ross G, Baselga J. Pooled analysis of cardiac safety in patients with cancer treated with pertuzumab. Ann Oncol. 2012;23(3):791-800.
	Aflibercept (Zaltrap)	Colorectal cancer;	0-1,2%	1	Hypertension (19-44%); Venous thromboembolism;			Li W, Croce K, Steensma DP, et al. Vascular and metabolic implications of novel targeted cancer therapies. JACC. 2015;66(10):1160-78	Leighl NB, Raez LE, Besse B, et al. A multicenter, phase 2 study of vascular endothelial growth factor trap (aflibercept) in platinum- and erlotinib-resistan adenocarcinoma of the lung. Journal of Thoracic oncology. 2010; 5(7):1054-1059
	Bevacizumab (Avastin)	Colorectal cancer; Breast cancer; Non-small cell lung carcinoma; Renal cell carcinoma; Gynecologic cancers;	0-1,6%	1	Hypertension; Arterial thromboembolism (3,8%)			Economopoulou P, Kotsakis A, Kapiris I et al. Cancer therapy and cardiovascular risk: focus on bevacizumab. Cancer Manag Res. 2015;7:133-43	Scappaticci FA, Skillings JR, Holden SN, et al. Arterial thromboembolic events in patients with metastatic carcinoma treated with chemotherapy and bevacizumab. J Natl Cancer Inst. 2007;99(16):1232-9	Chen J, Lu Y, Zheng Y. Incidence and risk of hypertension with bevacizumab in nonsmall-cell lung cancer patients: a metaanalysis of randomized controlled trials. Drug Des Dev Ther. 2015;9:4751-4760.
	Alemtuzumab (Lemtrada)	Relapsing-remitting Multiple Sclerosis	<1%	0	Hypotension;			Yeh, E. T. H. (2004). Cardiovascular Complications of Cancer Therapy: Diagnosis, Pathogenesis, and Management. Circulation, 109(25), 3122–3131. doi:10.1161/01.CIR.0000133187.74800.B9	Lenihan DJ, Alencar AJ, Yang D, et al. Cardiac toxicity of alemtuzumab in patients with mycosis fungoides/Sezary syndrome. Blood. 2004;104:655-658
	Brentuximab (Adcetris)	Hodgkin lymphoma; Anaplastic large cell lymphoma;	<1%	0				Vaklavas C, Forero-Torres A. Safety and efficacy of brentuximab vedotin in patients with Hodgkin lymphoma or systemic anaplastic large cell lymphoma. Ther Adv Hematol. 2012;3(4):209-225
	Cetuximab (Erbitux)	Colorectal cancer; Squamous cell carcinoma;	<1%	0				Gronich N, Lavi I, Barnett-Griness O, et al. Tyrosine kinase-targeting drugs-associated heart failure. British Journal of Cancer. 2017;116:1366-1373	Yang ZY, Liu L, Mao C, et al. Chemotherapy with cetuximab versus chemotherapy alone for chemotherapy-naive advanced non-small cell lung cancer. Cochrane Database Syst Rev. 2014;11:CD009948
	Panitumumab (Vectibix)	Colorectal cancer;	<1%	0				Gronich N, Lavi I, Barnett-Griness O, et al. Tyrosine kinase-targeting drugs-associated heart failure. British Journal of Cancer. 2017;116:1366-1373	Boku N, Sugihara K, Kitagawa Y et al. Panitumumab in Japanese patients with unresectable colorectal cancer: a post-marketing surveillance study of 3085 patients. Jpn J Clin Oncol. 2014;44(3):214-23
	Ramucirumab (Cyramza)	Gastro-intestinal tumours; Non-small cell lung carcinoma;	<1%	0	Hypertension; Arterial thromboembolism;			Wang J, Wang Z, Zhao Y. Incidence and risk of hypertension with ramucirumab in cancer patients: a meta-analysis of published studies. Clin Drug Investig. 2015; 35:221-228	Qi WX, Shen Z, Tang LN et al. Congestive heart failure risk in cancer patients treated with vascular endothelial growth factor tyrosine kinase inhibitors: a systematic review and meta-analysis of 36 clinical trials. British Journal of Pharmacology. 2014;78(4):748-762
	Rituximab (MabThera)	non-Hodgkin lymphoma; Leukemias;	<1%	0	Hypotension; Infusion related adverse events; Arrhythmias;			Yeh, E. T. H. (2004). Cardiovascular Complications of Cancer Therapy: Diagnosis, Pathogenesis, and Management. Circulation, 109(25), 3122–3131. doi:10.1161/01.CIR.0000133187.74800.B9
Proteasome inhibitors	Carfilzomib (Kyprolis)	Multiple myeloma;	3.8-7%	2	Myocardial infarction (0.8%); Pulmonary arterial hypertension (2%)			Siegel DS, Martin T, Wang M, et al. A phase 2 study of single-agent carfilzomib (PX-171-003-A1) in patients with relapsed and refractory multiple myeloma. Blood 2012; 120:2817.
	Bortezomib (Velcade)	Multiple myeloma; Mantle cell lymphoma;	0.02	1				Richardson PG, Sonneveld P, Schuster MW, et al. Bortezomib or high-dose dexamethasone for relapsed multiple myeloma. N Engl J Med 2005; 352:2487.
Small-molecule tyrosine kinase inhibitors	Pazopanib (Votrient)	Renal cell carcinoma; Soft tissue sarcoma;	7-13%	4	Hypertension; Thrombosis; Myocardial ischemia; Bradycardia; QT interval prolongation;			Hall PS, Harshman LC, Srinivas S, Witteles RM. The frequency and severity of cardiovascular toxicity from targeted therapy in advanced renal cell carcinoma patients. JACC Heart Fail. 2013; 1(1):72-78.	Motzer RJ, Hutson TE, Cella D, et al. Pazopanib versus sunitib in metastatic renal-cell carcinoma. N Engl J Med. 2013; 369(8):722-731.
	Sorafenib (Nexavar)	Hepatocellular carcinoma; Renal cell carcinoma; Thyroid carcinoma;	4-28%	4	Hypertension; Thrombembolism; Arrhythmias; QT interval prolongation;	Type II dysfunction;		Hall PS, Harshman LC, Srinivas S, Witteles RM. The frequency and severity of cardiovascular toxicity from targeted therapy in advanced renal cell carcinoma patients. JACC Heart Fail. 2013; 1(1):72-78.
	Sunitinib (Sutent)	Renal cell carcinoma; Gastrointestinal stromal tumour; Pancreatic neuroendocrine tumour;	3-15%	4	Hypertension; Thrombembolism; Arrhythmias; QT interval prolongation;	Type II dysfunction;		Chu TF, Rupnick MA, Kerkela R, et al. Cardiotoxicity associated with tyrosine kinase inhibitor sunitinib. Lancet. 2007;370(9604):2011-2019	Di Lorenzo G, Autorino R, Bruni G, et al. Cardiovascular toxicity following sunitinib therapy in metastatic renal cell carcinoma: a multicenter analysis. Ann Oncol. 2009;20(9):1535-1542.	Telli ML, Witteles RM, Fisher GA, Srinivas S. Cardiotoxicity associated with the cancer therapeutic agent sunitinib malate. Ann Oncol. 2008;19(9):1613-1618.
	Lenvatinib (Lenvima)	Thyroid carcinoma;	5-7%	2	Hypertension; Arterial and venous thromboembolism;			Li W, Croce K, Steensma DP, et al. Vascular and metabolic implications of novel targeted cancer therapies. JACC. 2015;66(10):1160-78	Shah Rr, Morganroth J. Update on Cardiovascular Safety of Tyrosine Kinase Inhibitors: With a Special Focus on QT Interval, Left Ventricular Dysfunction and Overall Risk/Benefit. Drug Safe. 2015;38(8):693-710
	Ponatinib (Iclusig)	Chronic myeloid leukemia; Acute lymphoblastic leukemia;	0.08	2				Hoy SM. Ponatinib: a review of its use in adults with chronic myeloid leukaemia or Philadelphia chromosome-positive acute lymphoblastic leukaemia. Drugs. 2014;74(7):793-806
	Trametinib (Mekinist)	Melanoma;	3-7%	2				Kim KB, Kefford R, Pavlick AC, et al. Phase II study of the MEK1/MEK2 inhibitor Trametinib in patients with metastatic BRAF-mutant cutaneous melanoma previously treated with or without a BRAF inhibitor. J Clin Oncol 2013; 31:482.	Flaherty KT, Robert C, Hersey P, et al. Improved survival with MEK inhibition in BRAF-mutated melanoma. N Engl J Med 2012; 367:107.
	Afatinib			1				Shah Rr, Morganroth J. Update on Cardiovascular Safety of Tyrosine Kinase Inhibitors: With a Special Focus on QT Interval, Left Ventricular Dysfunction and Overall Risk/Benefit. Drug Safe. 2015;38(8):693-710
	Axitinib (Inlyta)	Renal cell carcinoma;	0-1,8%	1				Kindler HL, Ioka T, Richel DJ, Bennouna J, Létourneau R, OkusakaT, et al. Axitinib plus gemcitabine versus placebo plus gemcitabine in patients with advanced pancreatic adenocarcinoma: a double-blind randomised phase 3 study. Lancet Oncol 2011;12:256–62.	Rugo HS, Stopeck AT, Joy AA, Chan S, Verma S, Lluch A, et al. Ran-domized, placebo-controlled, double-blind, phase II study of axitinib plus docetaxel versus docetaxel plus placebo in patients with metastaticbreast cancer. J Clin Oncol 2011;29:2459–65.
	Imatinib (Glivec)	Chronic myeloid leukemia; Acute lymphoblastic leukemia;	0,2-1,7%	1	Beneficial effects on glucose, cholesterol; Treatment for pulmonary arterial hypertension			Verweij J, Casali PG, Kotasek D et al. Imatinib does not induce cardiac left ventricular failure in gastrointestinal stromal tumours patients: analyis of EORTC-ISG-AGITG study 62005. Eur J Cancer 2007; 43: 974–978.	Perik PJ, Rikhof B, de Jong FA, et al. Results of plasma N-terminal pro B-type natriuretic peptide and cardiac troponin monitoring in GIST patients do not support the existence of imatinib-induced cardiotoxicity. Ann Oncol 2008; 19:359.	Atallah E, Durand JB, Kantarjian H, Cortes J. Congestive heart failure is a rare event in patients receiving imatinib threapy. Blood. 2007;110:1233-7
	Lapatinib (Tyverb)	Breast cancer;	1.5-2.2%	1	QT interval prolongation; Myocardial ischemia;	Type II dysfunction;		Perez EA, Koehler M, Byrne J, Preston AJ, Rappold E, Ewer MS. Cardiac safety of lapatinib: pooled analysis of 3689 patients enrolled in clinical trials. Mayo Clin Proc. 2008;83(6):679-686.
	Ceritinib (Zykadia)	Non-small cell lung carcinoma;	<1%	0	QT interval prolongation; Sinusbradycardia;			Zhu Q, Hu H, Weng DS, et al. Pooled safety analyses of ALK-TKI inhibitor in ALK-positive NSCLC. BMC Cancer. 2017;17:412
	Crizotinib (Xalkori)	Non-small cell lung carcinoma;	<1%	0	Sinusbradycardia;			Ou SH, Tong WP, Azada M, et al. Heart rate decrease during crizotinib treatment and potential correlation to clinical response. Cancer 2013; 119:1969.
	Ibrutinib (imbruvica)	Lymphomas;	<1%	0	Atrial fibrillation (3-6%);			Yun S, Vincelette N, Acharya U, et al. Risk of atrial fibrillation and bleeding diathesis associated with ibrutinib treatment: a systematic review and pooled analysis of four randomized controlled trials. Clin Lymphoma Myeloma Leuk. 2017; 17(1):31-37
	Dasatinib (Sprycel)	Chronic myeloid leukemia;	<1%	0	QT interval prolongation; Pulmonary arterial hypertension; Pleural effusion;			Keating GM. Dasatinib: a review in chronic myeloid leukaemia and Ph+ acute lymphoblastic leukaemia. Drugs. 2017;77:85-96
	Regorafenib (Stivarga)	Colorectal carcinoma; Gastroinestinal stromal tumour;	<1%	0	Hypertension; Myocardial ischemia;			Grothey A, van Cutsem E, Sobrere A, et al. Regorafenib monotherapy for previously treated metastatic colorectal cancer (CORRECT): an international, multicentre, randomised, placebo-controlled, phase 3 trial. Lancet. 2013; 381:303-12
	Vandetanib (Caprelsa)	Thyroid carcinoma;	<1%	0	QT interval prolongation; Torsades de pointes;			Ghatalia P, Morgan CJ, Je Y, et al. Congestive heart failure with vascular endothelial growth factor receptortyrosine kinase inhibitors. Critical reviews in oncology/hematology. 2015; 94(2):228-37
	Vemurafenib (Zelboraf)	Melanoma;	<1%	0	QT interval prolongation;			McArthur GA, Chapman PB, Robert C, et al. Safety and efficacy of vemurafenib in BRAF(V600E) and BRAF(V600K) mutation-positive melanoma (BRIM-3): extended follow-up of a phase 3, randomised, open-label study. Lancet oncol. 2014;15(3):323-32
Topoisomerase inhibitors	Etoposide (Eposin/Toposin)	Lung cancer; Leukemia;	<1%	0	Hypotension (1-2%); Acute myocardial infarction; Coronary vasospasm;			Pai VB, Nahata MC. Cardiotoxicity of chemotherapeutic agents: incidence, treatment and prevention. Drug Saf. 2000; 22(4):263-302.
	Teniposide (Vumon)	(non)-Hodgkin lymphoma; Leukemias;	<1%	0	Hypotension (2%); Arrhythmias;			Pai VB, Nahata MC. Cardiotoxicity of chemotherapeutic agents: incidence, treatment and prevention. Drug Saf. 2000; 22(4):263-302.
Immunosuppressiva	Lenalidomide (Revlimid)	Multiple myeloma; Mantle cell lymphoma; Myelodysplastic syndrome;	<1%	0	Venous or arterial thromboembolic events;			Moslehi JJ. Cardiovascular toxic effects of targeted cancer therapies. NEJM. 2016;375:1457-67
	Thalidomide	Multiple myeloma;	<1%	0	Venous or arterial thromboembolic events;			Moslehi JJ. Cardiovascular toxic effects of targeted cancer therapies. NEJM. 2016;375:1457-67
Misscellaneous	Estramustine (Estracyt)	Prostate cancer;	<1%	0	Arterial and venous thromboembolic events;			Lubiniecki GM, Berlin JA, Weinstein RB, et al. Thromboembolic events with estramustine phosphate-based chemotherapy in patients with hormone-refractory prostate carcinoma: results of a meta-analysis. Cancer. 2004;101(12):2755
	Amsacrine	Acute myeloid leukemia;	<1%	0	Atrial and ventricular tachyarrhythmias;			Pai VB, Nahata MC. Cardiotoxicity of chemotherapeutic agents: incidence, treatment and prevention. Drug Saf. 2000; 22(4):263-302.
	Anti-thymocyte globulin (ATG)	Prevention of graft-versus-host reaction (stemcell transplantation);	<1%	0				Gaber AO, Monaco, AP, Russel JA et al. Rabbit antithymocyte globulin (thymoglobulin): 25 years and new frontiers in solid organ transplantation and haematology.Drugs. 2010;70(6):691-732
	Asparaginase (Erwinase/Paronal)	Acute lymphoblastic leukemia;	<1%	0	Thromboembolic events; Myocardial infarction (1 case report);			Pai VB, Nahata MC. Cardiotoxicity of chemotherapeutic agents: incidence, treatment and prevention. Drug Saf. 2000; 22(4):263-302.
	Histone deacetylase inhibitors	Multiple myeloma;	<1%	0	ST-T abnormalities (15%); QT interval prolongation (4%);			Schiattarella GG, Sannino A, Toscano E, et al. Cardiovascular effects of histone deacetylase inhibitors epigenetic therapies: Systematic review of 62 studies and new hypotheses for future research. In J Cardiol. 2016;219:396-403
	Irinotecan	Colorectal carcinoma;	<1%	0				Lamb YN, Scott LJ. Liposomal irinotecan: a review in metastatic pancreatic adenocarcinoma. Drugs. 2017; 77:785-792
	LHRH agonist/antagonist	Prostate cancer;	<1%	0	QT interval prolongation;			Nguyen PL, Je Y, Schutz FAB, et al. Association of androgen deprivation therapy with cardiovascular death in patients with prostate cancer. A meta-analysis of randomized trials. JAMA. 2011; 306(21):2359-66

## Sheet: references
	Goldberg MA, Antin JH, Guinana EC, et al. Cycolphosphamide cardiotoxicity: an analysis of dosing as a risk factor. Blood. 1986;68:1114-8
	Gottdiener JS, Appelbaum FR, Ferrans VJ, et al. Cardiotoxicity associated with high-dose cyclophosphamide therapy. Arch Intern Med. 1981;141:758-63
	Steinherz LJ, Steinherz PG, Mangiacasale D, et al. Cardiac changes with cyclophosphamide. Med Pedriatr Oncol. 1981;9:417-22
	Qi WX, Shen Z, Tang LN et al. Congestive heart failure risk in cancer patients treated with vascular endothelial growth factor tyrosine kinase inhibitors: a systematic review and meta-analysis of 36 clinical trials. British Journal of Pharmacology. 2014;7
	Quezado ZM, Wilson WH, cunnion RE, et al. High-dose ifosfamide is associated with severe, reversible cardiac dysfunction. Ann Intern Med. 1993;11891):31-6
	Antman K, Crowley J, Balcerzak SP, et al. An intergroup phase III randomized study of doxorubicin and dacarbazine with or without ifosfamide and mensa in advanced soft tissue and bone sarcomas. J Clin Oncol. 1993;11(7):1276-85
	Yeh ET, Bickford CL. Cardiovascular complications of cancer therapy: incidence, pathogenesis, diagnosis, and management. J Am Coll Cardiol. 2009;53(24):2231-2247
	Cheson BD, Brugger W, Damaj G, et al. Optimal use of bendamustine in hematological disorders: Treatment recommendations from an international consensus panel - an update
	Pai VB, Nahata MC. Cardiotoxicity of chemotherapeutic agents: incidence, treatment and prevention. Drug Saf. 2000; 22(4):263-302.
	Khan S, Chen CL, Brady MS, et al. Unstable angina associated with cisplatin and carboplatin in a patient with advanced melanoma. Journal of Clinical Oncology. 2012 30(18):163-164
	Feliz V, Saiyad S, Ramarao SM, et al. Melphalan-induced supraventricular tachycardia: incidence and risk factors. Clin Cardiol. 2011; 34(6):356-359
	Ritchi DS, Seymour JF, Roberts AW et al. Acute left ventricular failure following melphalan and fludarabine conditioning. Bone Marrow Transplantation. 2001; 28:101-103
	von Hoff DD, Rozencweiq M, Layard M, et al. Daunomycin-induced cardiotoxicity in children and adults. A review of 110 cases. Am J Med. 1977;62(2):200-8
	Halazun JF, Wagner Hr, Gaeta JF. Daunorubicin cardiac toxicity in children with acute lymphocytic leukemia. Cancer. 1974;33(2):545-54
	Swain SM, Whaley FS, Ewer MS. Congestive heart failure in patients treated with doxorubicin. Cancer. 2003;97(11):2869-79
	von Hoff Dd, Layard MW, Basa P, et al. Risk factors for doxorubicin-induced congestive heart failure. Ann Intern Med. 1979;91(5):710-7
	Ryberg M, Nielsen D, Cortese G, et al. New insight into epirubicin cardiac toxicity: competing risk analysis of 1097 breast cancer patients. J Natl Cancer Inst. 2008;100(15):1058-67
	Nielsen D, Jensen JB, Dombernowsky P et al. Epirubicin cardiotoxicity: a study of 135 patients with advanced breast cancer. Journal of Clinical Oncology. 1990;8(11):1806-10
	Anderlini P, Benjamin RS, Wong FC, et al. Idarubicin cardiotoxicity: a retrospective study in acute myeloid leukemia and myelodysplasia. J Clin Oncol. 1995;13:2827-34
	Smith IE. Mitoxantrone (novantrone): a review of experimental and early clinical studies. Cancer Treat Rev. 1983;10:103-15
	Jeha S, Gaynon PS, Razzouk BI, et al. Phase II study of clofarabine in pediatric patients with refractory or relapsed acute lymphoblastic leukemia. J Clin Oncol. 2006;24(12):1917-23.
	Thomas X, de Botton S, chevret S, et al. Randomized phase II study of clofarabine-based consolidation for younger adults with acute myeloid leukemia in first remission. J Clin Onc
	https://www.accessdata.fda.gov/drugsatfda_docs/label/2004/021673lbl.pdf
	Fleischer V, Salmen A, Kollar S et al. Cardiotoxicity of mitoxantrone treatment in a German cohort of 639 multiple sclerosis patients. J Clin Neurol. 2014;10(4):289-295
	Navada SC, Silverman LR. Safety and efficacy of azacitidine in elderly patients with intermediate to high-risk myelodysplastic syndromes. Ther Adv Hematol. 2017;16(8):805-10
	Newman M, Malla M, Gojo I. Azacitidine-induced pericarditis: a case series. Pharmacotherapy. 2016;36(4):690-5
	Bibault JE, Cambier N, Lemahieu JM, et al. Acute myocarditis induced by hypomethylating agents. J Clin Oncol. 2011;29(14):e411-2
	Kelly C, Bhuva N, Harrison M, et al. Use of raltitrexed as an alternative to 5-fluorouracil and capecitabine in cancer patients with cardiac history. Eur J Cacer. 2013;49910):2303-10
	Polk A, Vaage-Nilsen M, Vistisen K, et al. Cardiotoxicity in cancer patients treated with 5-fluorouracil or capecitabine: a systematic review of incidence, manifestations and predisposing factors. Cancer Treatment Reviews. 2013;19:974-84
	Cerny J, Hassan A, Smith C, Piperdi B. Coronary vasospasm with myocardial stunning in a patient with colon cancer receiving adjuvant chemotherapy with FOLFOX regimen. Clin Colorectal Cancer. 2009;8(1):55-58.
	Koczwara B, Spangenthal E, Bernstein SH. The development of congestive cardiac failure in a patient with hairy cell leukemia treated with 2-chlorodeoxyadenosine. Leukemia & Lymphoma. 1997; 26:413-415
	Reykdal S, Sham R, Kouides P. Cytarabine-induced pericarditis: a case report and review of the literature on the cardio-pulmonary complications of cytarabine therapy. Leuk Res. 1995;19(2):141-4
	Gutheil J, Finucane D. Antimetabolites. In: The chemotherapy Sourcebook, 3rd, Perry MC, Lippincott, Williams and Wilkins, Philadelphia 2001, p 208.
	Khan MF, Gottesman S, Boyella R et al, Gemcitabine-induced cardiomyopathy: a case report and review of the literature. Journal of Medical Case Reports 2014; 8:220
	Grem JL, King SA, Chun GH, et al. Cardiac complications observed in elderly patients follow 2'-deoxycoformycin therapy. American Journal of Hematology. 1991; 38(3):245-247
	Jones RL, Ewer MS. Cardiac and cardiovascular toxicity of nonanthracycline anticancer drugs. Expert Review of Anticancer Therapy. 2006; 6(9):1249-69
	Vogelzang NJ, Frenning DH, Kennedy BJ, et al. Coronary artery disease after treatment with bleomycin and vinblastine. Cancer Treat Rep. 1980;64(10-11):1159
	Ewer MS, Suter TM, Lenihan DJ, et al. Cardiovascular events among 1090 cancer patients treated with sunitinib, interferon, or placebo: A comprehensive adjudicated database analysis demonstrating clinically meaningful reversibility of cardiac events. Eur J Canc (2014)50:2162-2170
	Slørdal L, Spigset O. Heart failure induced by non-cardiac drugs. Drug safety. 2006;29(7):567-586
	Jones RL, Ewer MS. Cardiac and cardiovascular toxicity of nonanthracycline anticancer drugs. Expert Review of Anticancer Therapy. 2006; 6(9):1249-69
	Marty M, Cognetti F, Maraninchi D, et al. Randomized phase II trial of the efficacy and safety of trastuzumab combined with docetaxel in patients with human epidermal growth factor receptor 2-positive metastatic breast cancer administered as first-line treatment: the M77001 study group. J Clin Oncol 2005; 23:4265-4274
	Lapeyre-Mestre M, Gregoire N, Bugat R, et al. Vinorelbine-related cardiac events: a meta-analysis of randomized clinical trials. Fundam Clin Pharmacol. 2004; 18(1):97-105
	Lesimple T, Edeline J, Carrothers TJ, et al. A phase I, open-label, single-arm study for QT assessment of eribulin mesylate in patients with advanced solid tumors. Investigational New Drugs. 2013; 31(4):900-909
	Perez EA, Lerzo G, Pivot X, et al. Efficacy and safety of ixabepilone (BMS-247550) in a phase II study of patients with advanced breast cancer resistant to an anthracycline, a taxane and capecitabine. J Clin Oncol. 2007;25:3407
	Thomas ES, Gomez HL, Li RK, et al. Ixabepilone plus capectabine for metastatic breast cancer progressing after anthracycline and taxane treatment. J Clin Oncol. 2007;25:5210
	Arbuck SG, Strauss H, Rowinsky E, et al. A reassessment of cardiac toxicity associated with Taxol. J Natl Cancer Inst Monogr. 1993;15:117-30
	Rowinsky EK, McGuire WP, Quarnieri T, et al. Cardiac disturbances during the administration of taxol. J Clin Oncol. 1991;9(9):1704-12
	Perez EA. Paclitaxel in breast cancer. The oncologist. 1998;3:373-389
	Hong WK, Nicaise C, Lawson R, et al. Etoposide combined with cyclophosphamide plus vincristine compared with doxorubicin plus cyclophosphamide plus vincristine and with high-dose cyclophosphamide plus vincrstine in the treatment of small-cell carcinoma of the lung: a randomized trial of the bristol lung cancer study group. J Clin Oncol. 1989;7(4):450-6
	Chatterjee K, Zhang J, Honbo N, et la. Acute vincristine pretreatment protects adult mouse cardiac myocytes from oxidative stress. J Mol Cell Cardiol. 2007;43(3):327-36
	Cargill RI, Boyter AC, Lipworth BJ. Reversible myocardial ischaemia following vincristine containing chemotherapy. Respir Med. 1994;88(9):709-10
	Mantarro S, Rossi M, Bonifazi M, et al. Risk of severe cardiotoxicity following treatment with trastuzumab: a meta-analysis of randomized and cohort studies of 29,000 women with breast cancer. Intern Emerg Med. 2016;11:123-140.
	Lenihan D, Suter T, Brammer M, Neate C, Ross G, Baselga J. Pooled analysis of cardiac safety in patients with cancer treated with pertuzumab. Ann Oncol. 2012;23(3):791-800.
	Li W, Croce K, Steensma DP, et al. Vascular and metabolic implications of novel targeted cancer therapies. JACC. 2015;66(10):1160-78
	Leighl NB, Raez LE, Besse B, et al. A multicenter, phase 2 study of vascular endothelial growth factor trap (aflibercept) in platinum- and erlotinib-resistan adenocarcinoma of the lung. Journal of Thoracic oncology. 2010; 5(7):1054-1059
	Gronich N, Lavi I, Barnett-Griness O, et al. Tyrosine kinase-targeting drugs-associated heart failure. British Journal of Cancer. 2017;116:1366-1373
	Yang ZY, Liu L, Mao C, et al. Chemotherapy with cetuximab versus chemotherapy alone for chemotherapy-naive advanced non-small cell lung cancer. Cochrane Database Syst Rev. 2014;11:CD009948
	Boku N, Sugihara K, Kitagawa Y et al. Panitumumab in Japanese patients with unresectable colorectal cancer: a post-marketing surveillance study of 3085 patients. Jpn J Clin Oncol. 2014;44(3):214-23
	Economopoulou P, Kotsakis A, Kapiris I et al. Cancer therapy and cardiovascular risk: focus on bevacizumab. Cancer Manag Res. 2015;7:133-43
	Scappaticci FA, Skillings JR, Holden SN, et al. Arterial thromboembolic events in patients with metastatic carcinoma treated with chemotherapy and bevacizumab. J Natl Cancer Inst. 2007;99(16):1232-9
	Chen J, Lu Y, Zheng Y. Incidence and risk of hypertension with bevacizumab in nonsmall-cell lung cancer patients: a metaanalysis of randomized controlled trials. Drug Des Dev Ther. 2015;9:4751-4760.
	Yeh, E. T. H. (2004). Cardiovascular Complications of Cancer Therapy: Diagnosis, Pathogenesis, and Management. Circulation, 109(25), 3122–3131. doi:10.1161/01.CIR.0000133187.74800.B9
	Lenihan DJ, Alencar AJ, Yang D, et al. Cardiac toxicity of alemtuzumab in patients with mycosis fungoides/Sezary syndrome. Blood. 2004;104:655-658
	Vaklavas C, Forero-Torres A. Safety and efficacy of brentuximab vedotin in patients with Hodgkin lymphoma or systemic anaplastic large cell lymphoma. Ther Adv Hematol. 2012;3(4):209-225
	Wang J, Wang Z, Zhao Y. Incidence and risk of hypertension with ramucirumab in cancer patients: a meta-analysis of published studies. Clin Drug Investig. 2015; 35:221-228
	Qi WX, Shen Z, Tang LN et al. Congestive heart failure risk in cancer patients treated with vascular endothelial growth factor tyrosine kinase inhibitors: a systematic review and meta-analysis of 36 clinical trials. British Journal of Pharmacology. 2014;78(4):748-762
	Siegel DS, Martin T, Wang M, et al. A phase 2 study of single-agent carfilzomib (PX-171-003-A1) in patients with relapsed and refractory multiple myeloma. Blood 2012; 120:2817.
	Richardson PG, Sonneveld P, Schuster MW, et al. Bortezomib or high-dose dexamethasone for relapsed multiple myeloma. N Engl J Med 2005; 352:2487.
	Hall PS, Harshman LC, Srinivas S, Witteles RM. The frequency and severity of cardiovascular toxicity from targeted therapy in advanced renal cell carcinoma patients. JACC Heart Fail. 2013; 1(1):72-78.
	Motzer RJ, Hutson TE, Cella D, et al. Pazopanib versus sunitib in metastatic renal-cell carcinoma. N Engl J Med. 2013; 369(8):722-731.
	Chu TF, Rupnick MA, Kerkela R, et al. Cardiotoxicity associated with tyrosine kinase inhibitor sunitinib. Lancet. 2007;370(9604):2011-2019
	Di Lorenzo G, Autorino R, Bruni G, et al. Cardiovascular toxicity following sunitinib therapy in metastatic renal cell carcinoma: a multicenter analysis. Ann Oncol. 2009;20(9):1535-1542.
	Telli ML, Witteles RM, Fisher GA, Srinivas S. Cardiotoxicity associated with the cancer therapeutic agent sunitinib malate. Ann Oncol. 2008;19(9):1613-1618.
	Shah Rr, Morganroth J. Update on Cardiovascular Safety of Tyrosine Kinase Inhibitors: With a Special Focus on QT Interval, Left Ventricular Dysfunction and Overall Risk/Benefit. Drug Safe. 2015;38(8):693-710
	Hoy SM. Ponatinib: a review of its use in adults with chronic myeloid leukaemia or Philadelphia chromosome-positive acute lymphoblastic leukaemia. Drugs. 2014;74(7):793-806
	Kim KB, Kefford R, Pavlick AC, et al. Phase II study of the MEK1/MEK2 inhibitor Trametinib in patients with metastatic BRAF-mutant cutaneous melanoma previously treated with or without a BRAF inhibitor. J Clin Oncol 2013; 31:482.
	Flaherty KT, Robert C, Hersey P, et al. Improved survival with MEK inhibition in BRAF-mutated melanoma. N Engl J Med 2012; 367:107.
	Kindler HL, Ioka T, Richel DJ, Bennouna J, Létourneau R, OkusakaT, et al. Axitinib plus gemcitabine versus placebo plus gemcitabinein patients with advanced pancreatic adenocarcinoma: a double-blindrandomised phase 3 study. Lancet Oncol 2011;12:256–62.
	Rugo HS, Stopeck AT, Joy AA, Chan S, Verma S, Lluch A, et al. Ran-domized, placebo-controlled, double-blind, phase II study of axitinib plus docetaxel versus docetaxel plus placebo in patients with metastaticbreast cancer. J Clin Oncol 2011;29:2459–65.
	Verweij J, Casali PG, Kotasek D et al. Imatinib does not induce cardiac left ventricular failure in gastrointestinal stromal tumours patients: analyis of EORTC-ISG-AGITG study 62005. Eur J Cancer 2007; 43: 974–978.
	Perik PJ, Rikhof B, de Jong FA, et al. Results of plasma N-terminal pro B-type natriuretic peptide and cardiac troponin monitoring in GIST patients do not support the existence of imatinib-induced cardiotoxicity. Ann Oncol 2008; 19:359.
	Atallah E, Durand JB, Kantarjian H, Cortes J. Congestive heart failure is a rare event in patients receiving imatinib threapy. Blood. 2007;110:1233-7
	Perez EA, Koehler M, Byrne J, Preston AJ, Rappold E, Ewer MS. Cardiac safety of lapatinib: pooled analysis of 3689 patients enrolled in clinical trials. Mayo Clin Proc. 2008;83(6):679-686.
	Zhu Q, Hu H, Weng DS, et al. Pooled safety analyses of ALK-TKI inhibitor in ALK-positive NSCLC. BMC Cancer. 2017;17:412
	Ou SH, Tong WP, Azada M, et al. Heart rate decrease during crizotinib treatment and potential correlation to clinical response. Cancer 2013; 119:1969.
	Yun S, Vincelette N, Acharya U, et al. Risk of atrial fibrillation and bleeding diathesis associated with ibrutinib treatment: a systematic review and pooled analysis of four randomized controlled trials. Clin Lymphoma Myeloma Leuk. 2017; 17(1):31-37
	Keating GM. Dasatinib: a review in chronic myeloid leukaemia and Ph+ acute lymphoblastic leukaemia. Drugs. 2017;77:85-96
	Grothey A, van Cutsem E, Sobrere A, et al. Regorafenib monotherapy for previously treated metastatic colorectal cancer (CORRECT): an international, multicentre, randomised, placebo-controlled, phase 3 trial. Lancet. 2013; 381:303-12
	Ghatalia P, Morgan CJ, Je Y, et al. Congestive heart failure with vascular endothelial growth factor receptortyrosine kinase inhibitors. Critical reviews in oncology/hematology. 2015; 94(2):228-37
	McArthur GA, Chapman PB, Robert C, et al. Safety and efficacy of vemurafenib in BRAF(V600E) and BRAF(V600K) mutation-positive melanoma (BRIM-3): extended follow-up of a phase 3, randomised, open-label study. Lancet oncol. 2014;15(3):323-32
	Moslehi JJ. Cardiovascular toxic effects of targeted cancer therapies. NEJM. 2016;375:1457-67
	Lubiniecki GM, Berlin JA, Weinstein RB, et al. Thromboembolic events with estramustine phosphate-based chemotherapy in patients with hormone-refractory prostate carcinoma: results of a meta-analysis. Cancer. 2004;101(12):2755
	Gaber AO, Monaco, AP, Russel JA et al. Rabbit antithymocyte globulin (thymoglobulin): 25 years and new frontiers in solid organ transplantation and haematology.Drugs. 2010;70(6):691-732
	Schiattarella GG, Sannino A, Toscano E, et al. Cardiovascular effects of histone deacetylase inhibitors epigenetic therapies: Systematic review of 62 studies and new hypotheses for future research. In J Cardiol. 2016;219:396-403
	Lamb YN, Scott LJ. Liposomal irinotecan: a review in metastatic pancreatic adenocarcinoma. Drugs. 2017; 77:785-792
	Nguyen PL, Je Y, Schutz FAB, et al. Association of androgen deprivation therapy with cardiovascular death in patients with prostate cancer. A meta-analysis of randomized trials. JAMA. 2011; 306(21):2359-66

## Sheet: regimens
ABVD	Doxorubicin	Bleomycine	Vinblastine	Dacarbazine
AC	Doxorubicin	Cyclophosphamide
ADE	Daunorubicin	Cytarabine	Etoposide
BEACOPP	Bleomycin	Etoposide	Doxorubicin	Cyclophosphamide
	Vincristine	Procarbazine	Prednisone
BEAM	Carmustine	Etoposide	Cytarabine	Melphalan
BVCPP	Carmustine	Vinblastine	Cyclophosphamide	Procarbazine	Prednisone
CAD	Cyclophosphamide	Doxorubicine
CaPox-B	Capecitabine	Oxaliplatin	Bevacizumab
COPDAC	Cyclophosphamide	Vincristine	Prednisone
DHAC	Cytarabine	Carboplatin
EBVP	Epirubicin	Bleomycine	Vinblastine	Prednisone
EC	Epirubicin	Cyclophosphamide
EOX	Epirubicin	Capecitabine	Oxaliplatin
FEC	5-fluoro-uracil	Epirubicin	Cyclophosphamide
FCR	Fludarabine	Cyclophosphamide	Rituximab
ICE	Ifosfamide	Carboplatin	Etoposide
IEP	Ifosfamide	Etoposide	Prednisone
IGEV	Ifosfamide	Gemcitabine	Vinorelbine
MBVP	Methotrexate	Carmustine	Teniposide	Prednisone
MOPP	Mechlorethamine	Vincristine	Procarbazine	Prednisone
OEPA	Vincristine	Etoposide	Doxorubicin
OPA	Vincristine	Prednisone	Doxorubicin
RAD	Lenalidomide	Doxorubicine	Dexamethason
R-CHOP	Rituximab	Cyclophosphamide	Vincristine	Prednisone	Doxorubicin
R-CVP	Rituximab	Cyclophosphamide	Vincristine	Prednisone
REP	Lenalidomide	Cyclophosphamide	Prednisone
R-DHAP	Rituximab	Dexamethason	Cytarabine	Cisplatin
R-FCM	Rituximab	fludarabine	Cyclophosphamide	mitoxantrone
R-ICE	Rituximab	Ifosfamide	Cisplatin	Etoposide
R-VIM	Rituximab	Etoposide	Ifosfamide	Methotrexate
SEQ	Cyclophosphamide	Methotrexate	Etoposide	Idarubicin
TAD	Doxorubicin	Thalidomide	Dexamethason
TAP	Thalidomide	Doxorubicin	Dexamethason
TEC	Docetaxel	Epirubicin	Cyclophosphamide
TICE	Docetaxel	Ifosfamide	Carboplatin	Etoposide
VAD	Vincristine	Doxorubicin	Dexamethason
VCD	Bortezomib	Cyclophosphamide	Dexamethason
VMP	Bortezomib	Melphalan	Prednisone
VTD	Bortezomib	Thalidomide	Dexamethason
Allo stam 03	ATG	Busulfan	Fludarabine
Allo stam 05	ATG	Fludarabine	TBI
Allo stam 06	Fludarabine	TBI
Allo stam 14	Busulfan	Fludarabine
Allo stam 15	ATG	Busulfan	Fludarabine
Allo stam 19	Amsacrine	ATG	Cyclophosphamide	Cytarabine
	Fludarabine	TBI
Allo stam 20	Amsacrine	Cyclophosphamide	Cytarabine	Fludarabine	TBI
Allo stam 30	Busulfan	Fludarabine
Allo stam 32	Busulfan	Fludarabine
Allo stam 33	ATG	Busulfan	Fludarabine
Auto stam 03	Melphalan	Cryotherapy
Hovon 18	Daunorubicin	Vincristine	Asparaginase	Methotrexate	Cytarabine
	Cyclophosphamide
Hovon 37	Daunorubicin	Mitoxantrone
Hovon 86	Bortezomib	Lenalidomide	Dexamethason
Hovon 100 >40 years	Doxorubicin	Clofarabine (arm B)	Vincristine	Etoposide	Cytarabine
	Leucovorin	Methotrexate
Hovon 100 < 40 years	Doxorubicin	Daunorubicin	Vincristine	Clofarabine (arm B)	Etoposide
	Cytarabine	6-mercaptopurine	Vindesine	Methotrexate
Hovon 102	Idarubicin	Clofarabine (arm B)	Cytarabine	Amsacrine
Hovon 103	Daunorubicin
Hovon 132	Idarubicin	Daunorubicin	Cytarabine
